# Supplementary material
Source: MDPI journal article supplement (https://www.mdpi.com/2073-4468/10/1/2)
Supplement: s1 [file s1]

## Akhir Supplemental Data

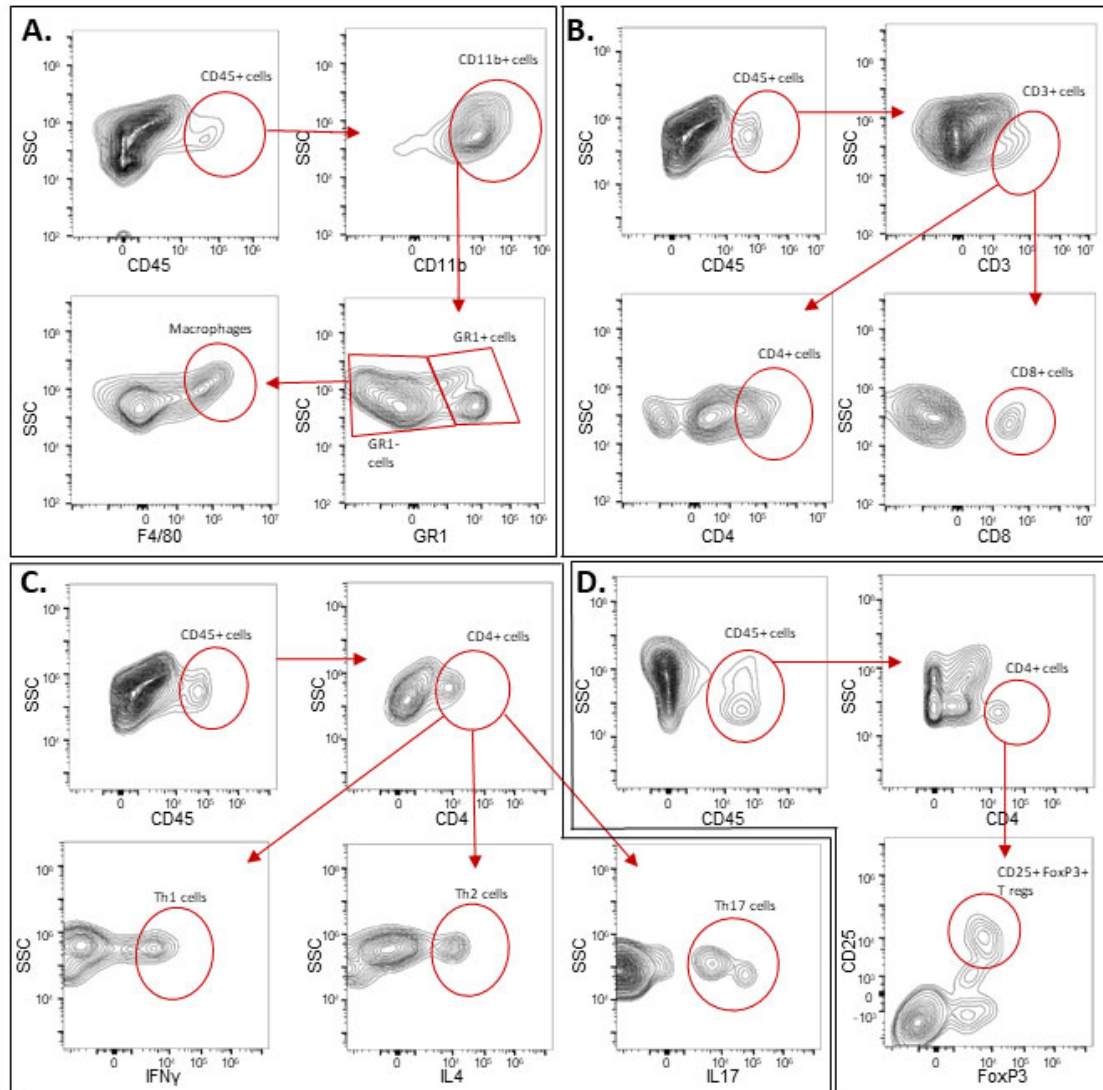

**Supplemental Figure 1. Gating strategies for flow cytometric analysis of the tumor inflammatory infiltrate.** Cells were first gated on viability and size (SSC-A vs. FSC-A; not shown), then CD45<sup>+</sup> cells (total leukocytes) were (**A**) gated for CD11b<sup>+</sup> (myeloid cells) which were sub-gated for Gr-1<sup>+</sup> cells, with F480<sup>+</sup> (macrophages) derived from the Gr-1<sup>+</sup> population; (**B**) CD45<sup>+</sup> cells were also gated for total T lymphocytes (CD3<sup>+</sup>) which were further separated into CD8<sup>+</sup> and CD4<sup>+</sup> sub-sets. For populations with intracellular cytokines, CD4<sup>+</sup> cells were gated (**C**) into Th1 (CD4<sup>+</sup>IFN $\gamma$ <sup>+</sup>), Th2 (CD4<sup>+</sup>IL4<sup>+</sup>) Th17 (CD4<sup>+</sup>IL17<sup>+</sup>) and (**D**) Tregs (CD4<sup>+</sup>CD25<sup>+</sup>FOXP3<sup>+</sup>). For each gated population, the frequency of cells was expressed as percentage of CD45<sup>+</sup> or CD4<sup>+</sup> cells.
